# Supplementary material
Source: PubMed Central journal article supplement (PMC2933275)
Supplement: NIHMS226999-supplement-1_si_001.pdf [file NIHMS226999-supplement-1_si_001.pdf]

**Supplementary Table 1.** Raw biomarker metabolite mean values and standard deviations in GNMT mouse normal liver (GNMT-WT) and NAFLD (GNMT-KO) sera subgroups

| Family | Name (Figure 2/3)     | Average GNMT-WT | SD GNMT-WT | Average GNMT-KO | SD GNMT-KO |
|--------|-----------------------|-----------------|------------|-----------------|------------|
| FFAs   | 14:0                  | 0.00133         | 0.00037    | 0.00156         | 0.00068    |
| FFAs   | 16:0                  | 0.05684         | 0.00455    | 0.05321         | 0.00780    |
| FFAs   | 18:0                  | 0.02066         | 0.00186    | 0.02566         | 0.00258    |
| FFAs   | 16:1n-7               | 0.02425         | 0.00801    | 0.02133         | 0.00851    |
| FFAs   | 18:1n-9               | 0.11622         | 0.01384    | 0.11024         | 0.01117    |
| FFAs   | 18:2n-6               | 0.14900         | 0.02915    | 0.09732         | 0.01304    |
| FFAs   | 18:3n-3 + n-6         | 0.02762         | 0.00756    | 0.01444         | 0.00271    |
| FFAs   | 20:1n-9               | 0.01255         | 0.00309    | 0.01079         | 0.00101    |
| FFAs   | 20:2n-6               | 0.00810         | 0.00118    | 0.00537         | 0.00038    |
| FFAs   | 20:3n-3 + n-6 + n-9   | 0.03455         | 0.00485    | 0.03309         | 0.00160    |
| FFAs   | 20:4n-6               | 0.22718         | 0.02386    | 0.33407         | 0.03547    |
| FFAs   | 20:5n-3               | 0.01907         | 0.00250    | 0.00762         | 0.00087    |
| FFAs   | 22:4n-6               | 0.01903         | 0.00132    | 0.01793         | 0.00229    |
| FFAs   | 22:5n-3               | 0.01358         | 0.00154    | 0.00775         | 0.00042    |
| FFAs   | 22:5n-6               | 0.06398         | 0.00517    | 0.05091         | 0.01503    |
| FFAs   | 22:6n-3               | 0.20603         | 0.02302    | 0.20871         | 0.01738    |
| LPCs   | 14:0                  | 0.00538         | 0.00078    | 0.00530         | 0.00049    |
| LPCs   | 15:0                  | 0.00474         | 0.00079    | 0.00425         | 0.00071    |
| LPCs   | 16:0                  | 0.26305         | 0.01453    | 0.25591         | 0.01070    |
| LPCs   | 16:1                  | 0.03566         | 0.00715    | 0.04970         | 0.00490    |
| LPCs   | 18:0                  | 0.20518         | 0.00833    | 0.18736         | 0.00653    |
| LPCs   | 18:1                  | 0.15581         | 0.01417    | 0.18743         | 0.00793    |
| LPCs   | 18:2                  | 0.15902         | 0.01410    | 0.12840         | 0.00477    |
| LPCs   | 20:0                  | 0.02053         | 0.00370    | 0.00779         | 0.00078    |
| LPCs   | 20:1                  | 0.01685         | 0.00260    | 0.01445         | 0.00089    |
| LPCs   | 20:2                  | 0.00842         | 0.00094    | 0.00565         | 0.00031    |
| LPCs   | 20:3                  | 0.02671         | 0.00689    | 0.02735         | 0.00377    |
| LPCs   | 20:4                  | 0.05855         | 0.00559    | 0.09122         | 0.00436    |
| LPCs   | 20:5                  | 0.00432         | 0.00096    | 0.00248         | 0.00055    |
| LPCs   | 22:4                  | 0.00280         | 0.00071    | 0.00272         | 0.00038    |
| LPCs   | 22:5                  | 0.00502         | 0.00133    | 0.00428         | 0.00157    |
| LPCs   | 22:6                  | 0.02629         | 0.00212    | 0.02445         | 0.00257    |
| SMs    | d18:1/14:0            | 0.43469         | 0.06667    | 0.42107         | 0.09164    |
| SMs    | d18:1/15:0            | 0.02742         | 0.00239    | 0.02110         | 0.00104    |
| SMs    | d18:1/16:0            | 0.02687         | 0.00443    | 0.02611         | 0.00142    |
| SMs    | d18:2/16:0            | 0.08887         | 0.01347    | 0.08484         | 0.00910    |
| SMs    | d18:1/18:0            | 0.51618         | 0.03410    | 0.55278         | 0.01140    |
| SMs    | SM 36:2               | 0.31052         | 0.03088    | 0.28444         | 0.01443    |
| SMs    | SM 36:3               | 0.00358         | 0.00124    | 0.00286         | 0.00043    |
| SMs    | d18:0/16:0            | 0.02225         | 0.00254    | 0.02152         | 0.00077    |
| SMs    | d18:1/12:0            | 0.07039         | 0.01706    | 0.05424         | 0.01795    |
| SMs    | d18:2/14:0            | 0.02669         | 0.01108    | 0.01876         | 0.00358    |
| BAs    | Cholic                | 0.00024         | 0.00027    | 0.00043         | 0.00022    |
| BAs    | Deoxycholic           | 0.00007         | 0.00003    | 0.00015         | 0.00009    |
| BAs    | Taurocholic           | 0.00284         | 0.00373    | 0.00249         | 0.00143    |
| BAs    | Taurochenodeoxycholic | 0.00030         | 0.00017    | 0.00014         | 0.00006    |
| BAs    | Taurodeoxycholic      | 0.00102         | 0.00023    | 0.00043         | 0.00015    |
| PCs    | 14:0/20:4             | 0.00973         | 0.00256    | 0.01377         | 0.00107    |
| PCs    | 15:0/18:2             | 0.00707         | 0.00106    | 0.00595         | 0.00135    |
| PCs    | 16:0/14:0             | 0.00087         | 0.00021    | 0.00103         | 0.00020    |
| PCs    | 16:0/18:1             | 0.05339         | 0.00538    | 0.05473         | 0.00194    |
| PCs    | 16:0/18:2             | 0.13321         | 0.01404    | 0.10242         | 0.00426    |
| PCs    | 16:0/20:4             | 0.05779         | 0.00653    | 0.07912         | 0.00300    |
| PCs    | 16:0/22:6             | 0.15573         | 0.00453    | 0.16898         | 0.00476    |
| PCs    | 16:1/18:2             | 0.06956         | 0.00638    | 0.07665         | 0.00469    |
| PCs    | 18:0/18:2             | 0.08834         | 0.00655    | 0.07193         | 0.00127    |
| PCs    | 18:0/20:3             | 0.01806         | 0.00243    | 0.01906         | 0.00187    |
| PCs    | 18:0/20:4             | 0.02503         | 0.00408    | 0.03680         | 0.00254    |
| PCs    | 18:0/22:6             | 0.02363         | 0.00231    | 0.02038         | 0.00245    |
| PCs    | 18:1/20:4             | 0.02172         | 0.00415    | 0.03824         | 0.00418    |
| PCs    | 18:1/22:6             | 0.01470         | 0.00173    | 0.01629         | 0.00236    |
| PCs    | 18:2/18:2             | 0.11653         | 0.01846    | 0.07510         | 0.00641    |
| PCs    | 18:2/20:4             | 0.04591         | 0.00464    | 0.05453         | 0.00294    |
| PCs    | PC 28:0               | 0.00011         | 0.00004    | 0.00012         | 0.00003    |
| PCs    | PC 32:1               | 0.01408         | 0.00456    | 0.01163         | 0.00106    |
| PCs    | PC 34:3               | 0.01816         | 0.00236    | 0.01604         | 0.00115    |
| PCs    | PC 36:3               | 0.09051         | 0.00310    | 0.08469         | 0.00350    |
| PCs    | PC 36:5               | 0.03588         | 0.00901    | 0.05254         | 0.00432    |

**Supplementary Table 2.** Raw biomarker metabolite mean values and standard deviations in human normal liver (S0) and NAFLD (S1, S2, S3, S3+NASH) sera subgroups.

| Family | Name                  | Average Healthy | SD Healthy | Average NAFLD | SD NAFLD |
|--------|-----------------------|-----------------|------------|---------------|----------|
| FFAs   | 14:0                  | 0.00928         | 0.00286    | 0.01024       | 0.00315  |
| FFAs   | 16:0                  | 0.12845         | 0.01632    | 0.13819       | 0.01516  |
| FFAs   | 18:0                  | 0.04322         | 0.00903    | 0.04686       | 0.01124  |
| FFAs   | 16:1n-7               | 0.04930         | 0.02207    | 0.05009       | 0.01578  |
| FFAs   | 18:1n-9               | 0.39533         | 0.01545    | 0.39296       | 0.03532  |
| FFAs   | 18:2n-6               | 0.22697         | 0.04169    | 0.20919       | 0.03900  |
| FFAs   | 18:3n-3 + n-6         | 0.01844         | 0.00409    | 0.01543       | 0.00356  |
| FFAs   | 20:1n-9               | 0.00496         | 0.00074    | 0.00490       | 0.00103  |
| FFAs   | 20:2n-6               | 0.00578         | 0.00087    | 0.00489       | 0.00080  |
| FFAs   | 20:3n-3 + n-6 + n-9   | 0.01351         | 0.00229    | 0.01416       | 0.00322  |
| FFAs   | 20:4n-6               | 0.05480         | 0.01499    | 0.06205       | 0.02594  |
| FFAs   | 20:5n-3               | 0.00611         | 0.00508    | 0.00602       | 0.00319  |
| FFAs   | 22:4n-6               | 0.00782         | 0.00121    | 0.00811       | 0.00168  |
| FFAs   | 22:5n-3               | 0.00841         | 0.00381    | 0.00897       | 0.00257  |
| FFAs   | 22:5n-6               | 0.00384         | 0.00094    | 0.00390       | 0.00109  |
| FFAs   | 22:6n-3               | 0.02379         | 0.01116    | 0.02403       | 0.00803  |
| LPCs   | 14:0                  | 0.01895         | 0.01000    | 0.02053       | 0.00689  |
| LPCs   | 15:0                  | 0.01160         | 0.00513    | 0.01073       | 0.00249  |
| LPCs   | 16:0                  | 0.25388         | 0.01619    | 0.25266       | 0.01459  |
| LPCs   | 16:1                  | 0.03745         | 0.00959    | 0.04307       | 0.01089  |
| LPCs   | 18:0                  | 0.16868         | 0.01713    | 0.17926       | 0.01196  |
| LPCs   | 18:1                  | 0.17264         | 0.01477    | 0.17640       | 0.01178  |
| LPCs   | 18:2                  | 0.15873         | 0.01728    | 0.15476       | 0.01926  |
| LPCs   | 20:0                  | 0.00160         | 0.00080    | 0.00133       | 0.00039  |
| LPCs   | 20:1                  | 0.00453         | 0.00139    | 0.00373       | 0.00093  |
| LPCs   | 20:2                  | 0.00808         | 0.00207    | 0.00644       | 0.00155  |
| LPCs   | 20:3                  | 0.06146         | 0.01123    | 0.05907       | 0.01195  |
| LPCs   | 20:4                  | 0.07074         | 0.00822    | 0.06232       | 0.00873  |
| LPCs   | 20:5                  | 0.00541         | 0.00484    | 0.00435       | 0.00228  |
| LPCs   | 22:4                  | 0.00418         | 0.00155    | 0.00412       | 0.00129  |
| LPCs   | 22:5                  | 0.00438         | 0.00232    | 0.00446       | 0.00127  |
| LPCs   | 22:6                  | 0.01761         | 0.00483    | 0.01666       | 0.00430  |
| SMs    | d18:1/14:0            | 0.17951         | 0.02478    | 0.17684       | 0.03084  |
| SMs    | d18:1/15:0            | 0.08857         | 0.01132    | 0.09051       | 0.01514  |
| SMs    | d18:1/16:0            | 0.33432         | 0.02073    | 0.35128       | 0.03096  |
| SMs    | d18:2/16:0            | 0.26832         | 0.01469    | 0.24818       | 0.01872  |
| SMs    | d18:1/18:0            | 0.01474         | 0.00443    | 0.02035       | 0.00714  |
| SMs    | SM 36:2               | 0.07762         | 0.01585    | 0.07784       | 0.01383  |
| SMs    | SM 36:3               | 0.01934         | 0.00472    | 0.01513       | 0.00390  |
| SMs    | d18:0/16:0            | 0.01758         | 0.00288    | 0.01988       | 0.00582  |
| SMs    | d18:1/12:0            | 0.01122         | 0.00264    | 0.00915       | 0.00348  |
| SMs    | D18:2/14:0            | 0.02507         | 0.00405    | 0.01882       | 0.00631  |
| BAs    | Cholic                | 0.00055         | 0.00061    | 0.00061       | 0.00103  |
| BAs    | Deoxycholic           | 0.00004         | 0.00004    | 0.00012       | 0.00010  |
| BAs    | Taurocholic           | 0.00009         | 0.00007    | 0.00009       | 0.00008  |
| BAs    | Taurochenodeoxycholic | 0.00033         | 0.00027    | 0.00035       | 0.00031  |
| BAs    | Taurodeoxycholic      | 0.00014         | 0.00015    | 0.00013       | 0.00011  |
| PCs    | 14:0/20:4             | 0.00928         | 0.00284    | 0.00943       | 0.00332  |
| PCs    | 15:0/18:2             | 0.01835         | 0.00281    | 0.01820       | 0.00462  |
| PCs    | 16:0/14:0             | 0.01312         | 0.00209    | 0.01328       | 0.00415  |
| PCs    | 16:0/18:1             | 0.06432         | 0.00600    | 0.06660       | 0.00672  |
| PCs    | 16:0/18:2             | 0.11162         | 0.01945    | 0.11494       | 0.01879  |
| PCs    | 16:0/20:4             | 0.05472         | 0.00502    | 0.05571       | 0.00548  |
| PCs    | 16:0/22:6             | 0.10101         | 0.01240    | 0.09674       | 0.01081  |
| PCs    | 16:1/18:2             | 0.07091         | 0.00662    | 0.07368       | 0.01168  |
| PCs    | 18:0/18:2             | 0.09014         | 0.01304    | 0.08781       | 0.01195  |
| PCs    | 18:0/20:3             | 0.02734         | 0.00644    | 0.02567       | 0.00725  |
| PCs    | 18:0/20:4             | 0.01623         | 0.00302    | 0.01635       | 0.00294  |
| PCs    | 18:0/22:6             | 0.01496         | 0.00234    | 0.01336       | 0.00262  |
| PCs    | 18:1/20:4             | 0.02174         | 0.00276    | 0.02068       | 0.00369  |
| PCs    | 18:1/22:6             | 0.00406         | 0.00148    | 0.00332       | 0.00088  |
| PCs    | 18:2/18:2             | 0.08049         | 0.00790    | 0.08482       | 0.01302  |
| PCs    | 18:2/20:4             | 0.02703         | 0.00448    | 0.02605       | 0.00359  |
| PCs    | PC 28:0               | 0.00408         | 0.00129    | 0.00517       | 0.00303  |
| PCs    | PC 32:1               | 0.05487         | 0.01192    | 0.05609       | 0.01605  |
| PCs    | PC 34:3               | 0.01577         | 0.00496    | 0.01543       | 0.00454  |
| PCs    | PC 36:3               | 0.10719         | 0.00751    | 0.10745       | 0.00835  |
| PCs    | PC 36:5               | 0.09276         | 0.01558    | 0.08924       | 0.02061  |
